# Supplementary material
Source: PubMed Central journal article supplement (PMC1693752)

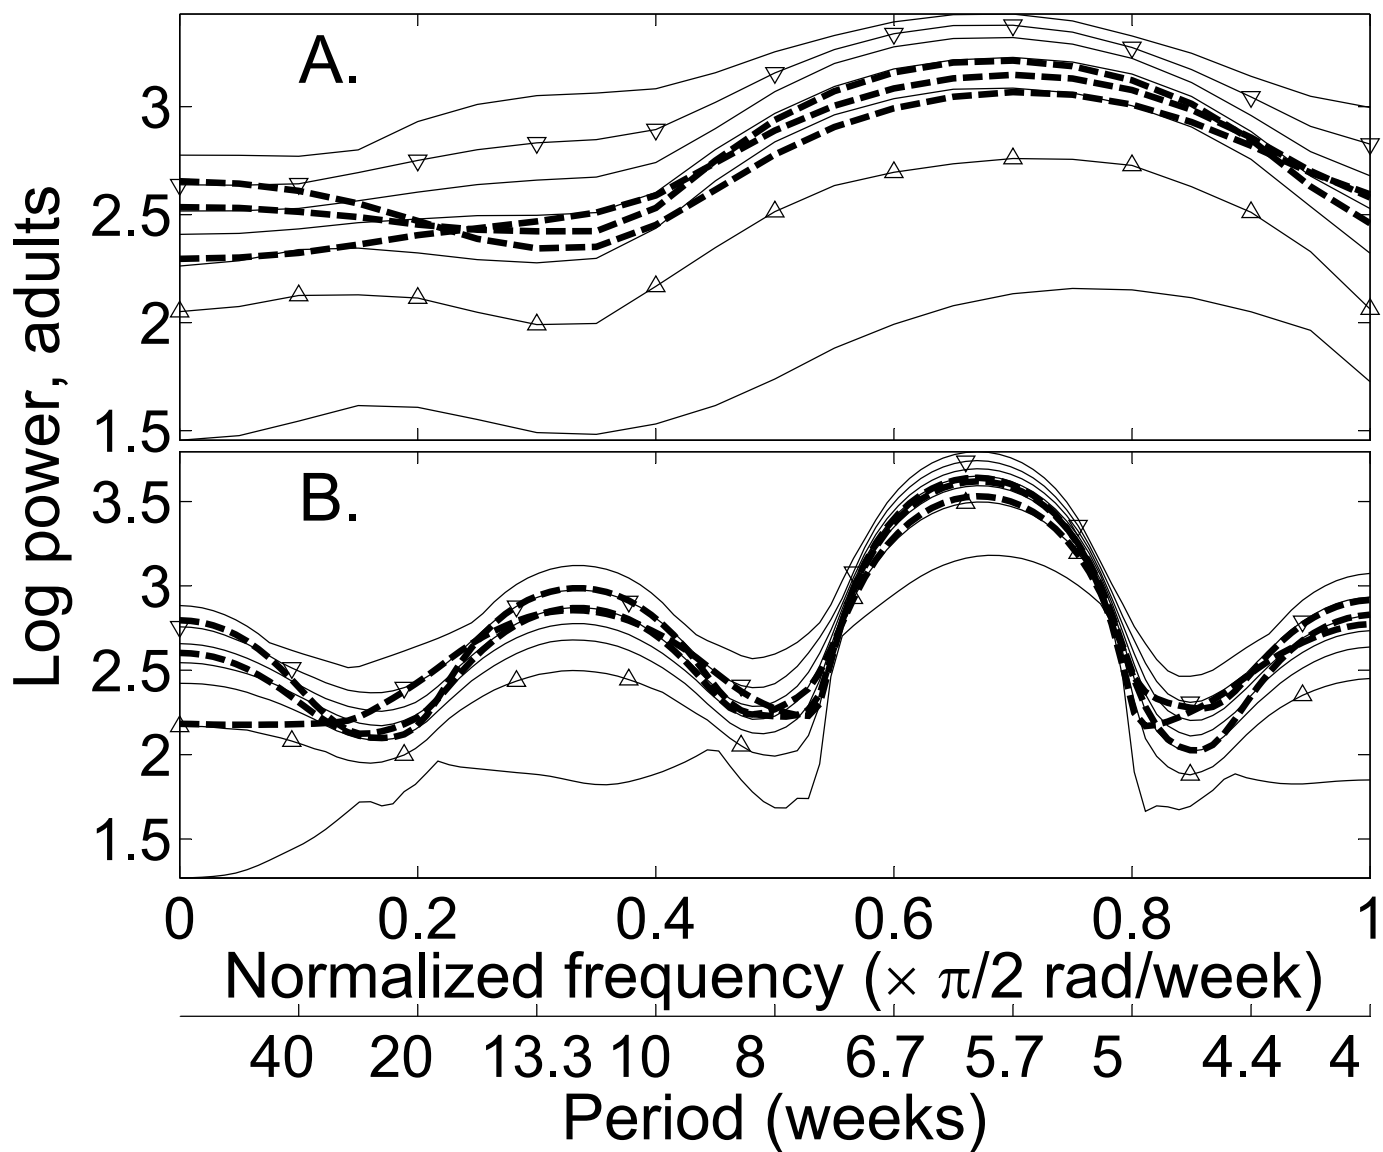

Supplement: pnas_0608571103_2.pdf [file pnas_0608571103_2.pdf]

**A, B:**

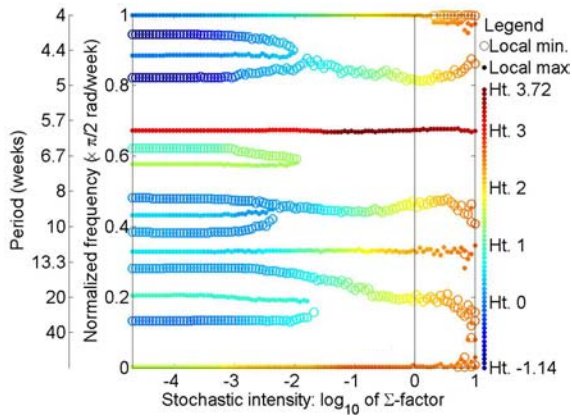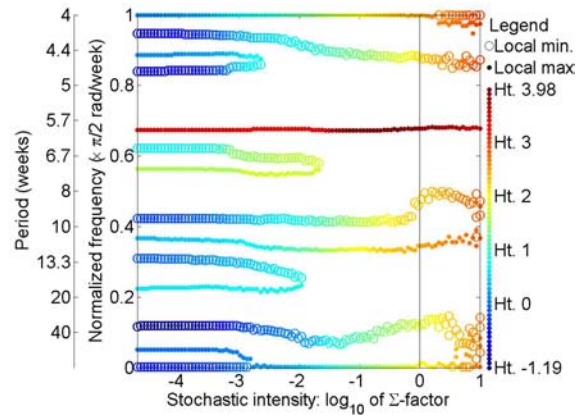

**C, D:**

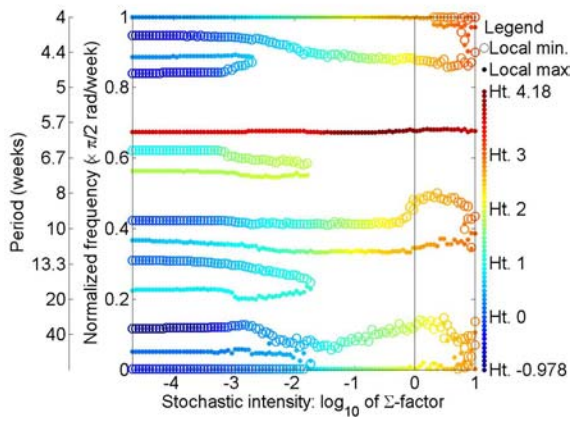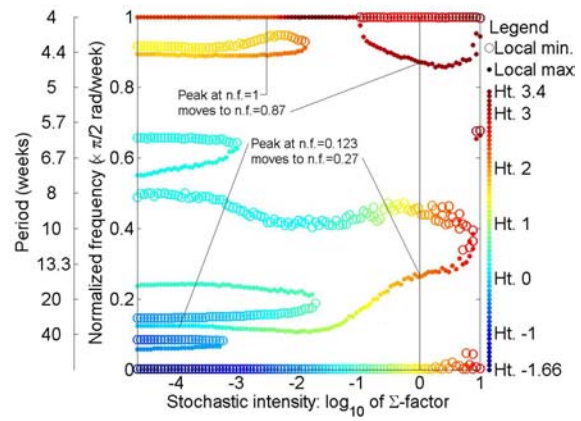

**E, F:**

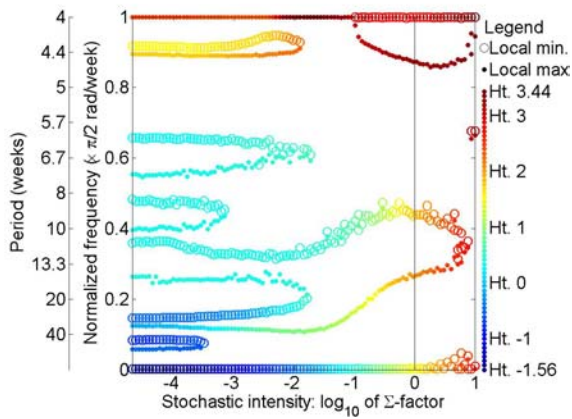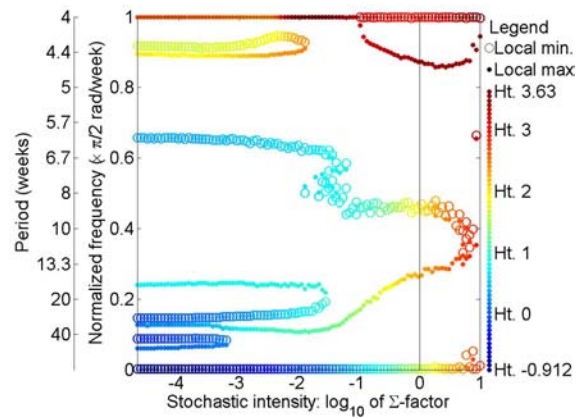

Supplement: pnas_0608571103_3.pdf [file pnas_0608571103_3.pdf]

**A, B:**

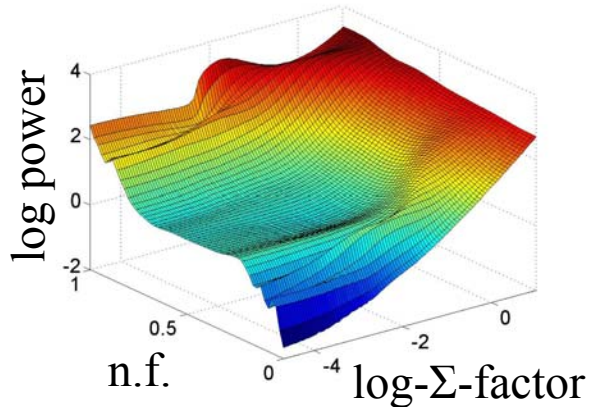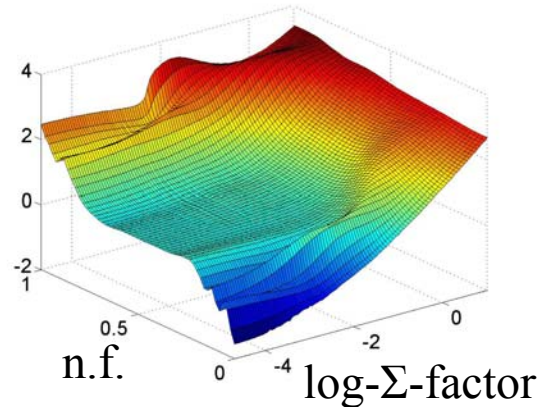

**C:**

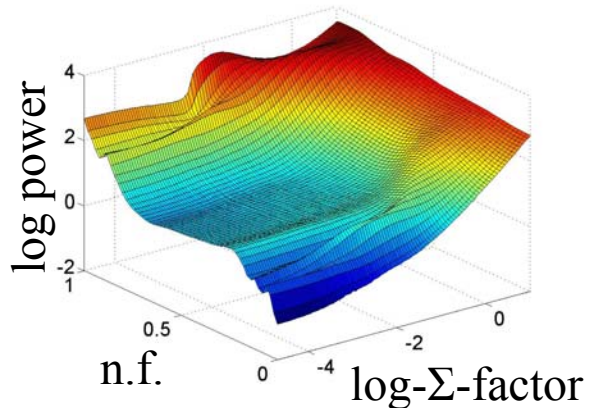

Supplement: pnas_0608571103_4.pdf [file pnas_0608571103_4.pdf]

**A:**  $c_{pa} = 0.05$ ; **B:**  $c_{pa} = 0.1$

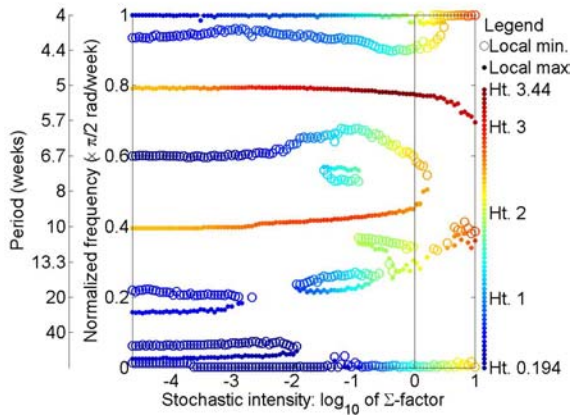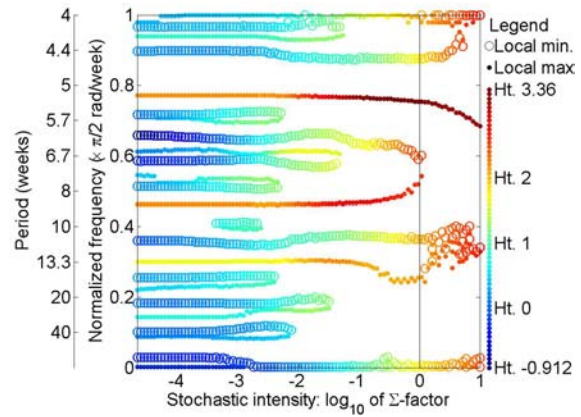

**C:**  $c_{pa} = 0.25$ ; **D:**  $c_{pa} = 0.35$

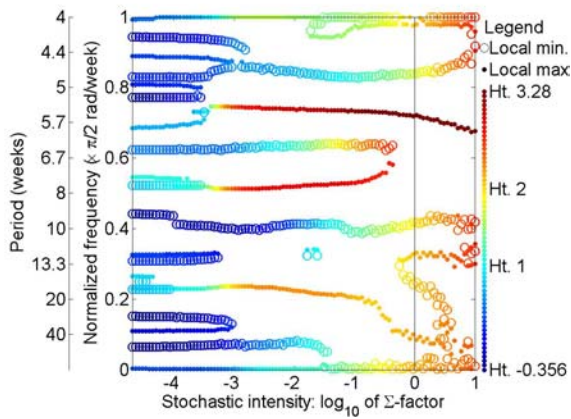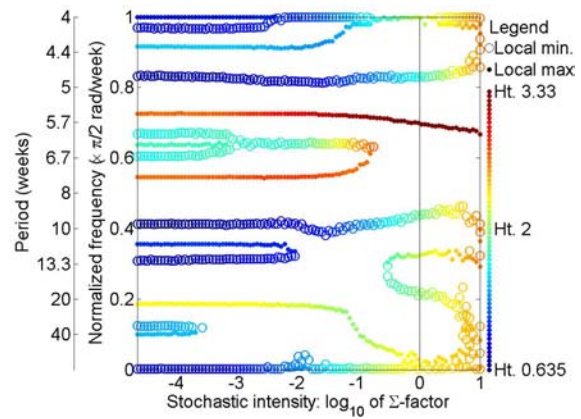

**E:**  $c_{pa} = 1$

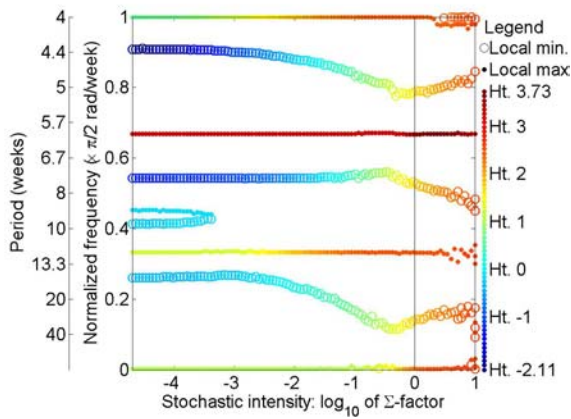

Supplement: pnas_0608571103_5.pdf [file pnas_0608571103_5.pdf]

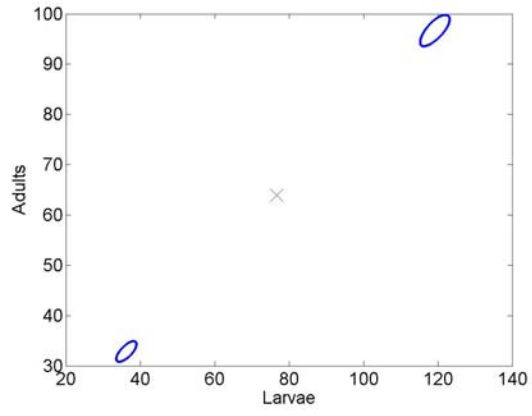

Supplement: pnas_0608571103_6.pdf [file pnas_0608571103_6.pdf]
